# Supplementary material for: Effect of Drip Irrigation and Fertigation on Soil Water Dynamics and Productivity of Greenhouse Tomatoes
Source: MDPI journal article supplement (doi:10.3390/w15112086), 2023-05-31
Supplement: s1 [file s1]

**Supplementary Table S1.** Discharge rate, variation and uniformity coefficient of different plots.

| Strip No.       | Discharge rate (L h <sup>-1</sup> ) |      |      |      |         | Discharge variation (%) | Uniformity coefficient (%) |
|-----------------|-------------------------------------|------|------|------|---------|-------------------------|----------------------------|
|                 | A                                   | B    | C    | D    | Average |                         |                            |
| 1               | 0.70                                | 0.65 | 0.80 | 0.70 | 0.71    | 18.8                    | 97.11                      |
| 2               | 0.76                                | 0.65 | 0.75 | 0.60 | 0.69    | 20.0                    | 96.72                      |
| 3               | 0.65                                | 0.70 | 0.65 | 0.75 | 0.69    | 7.1                     | 98.07                      |
| 4               | 0.60                                | 0.70 | 0.50 | 0.55 | 0.59    | 16.7                    | 96.51                      |
| 5               | 0.60                                | 0.55 | 0.45 | 0.50 | 0.53    | 18.2                    | 98.36                      |
| 6               | 0.55                                | 0.60 | 0.50 | 0.60 | 0.56    | 16.7                    | 98.07                      |
| 7               | 0.65                                | 0.55 | 0.60 | 0.60 | 0.60    | 15.4                    | 99.25                      |
| 8               | 0.55                                | 0.60 | 0.50 | 0.45 | 0.53    | 18.2                    | 97.70                      |
| 9               | 0.47                                | 0.45 | 0.52 | 0.59 | 0.51    | 4.3                     | 98.07                      |
| 10              | 0.65                                | 0.55 | 0.54 | 0.52 | 0.57    | 20.0                    | 98.80                      |
| 11              | 0.70                                | 0.65 | 0.50 | 0.60 | 0.61    | 7.1                     | 97.51                      |
| 12              | 0.70                                | 0.80 | 0.65 | 0.50 | 0.66    | 18.8                    | 94.82                      |
| 13              | 0.68                                | 0.54 | 0.55 | 0.60 | 0.59    | 19.1                    | 98.48                      |
| 14              | 0.60                                | 0.53 | 0.58 | 0.70 | 0.60    | 17.1                    | 97.10                      |
| 15              | 0.50                                | 0.48 | 0.54 | 0.67 | 0.55    | 11.1                    | 97.30                      |
| 16              | 0.60                                | 0.58 | 0.65 | 0.52 | 0.59    | 20.0                    | 97.98                      |
| 17              | 0.68                                | 0.60 | 0.55 | 0.70 | 0.63    | 19.1                    | 97.11                      |
| 18              | 0.51                                | 0.60 | 0.50 | 0.52 | 0.53    | 2.0                     | 98.50                      |
| 19              | 0.80                                | 0.60 | 0.50 | 0.65 | 0.64    | 16.7                    | 97.01                      |
| 20              | 0.60                                | 0.52 | 0.55 | 0.50 | 0.54    | 13.3                    | 99.02                      |
| 21              | 0.66                                | 0.59 | 0.72 | 0.60 | 0.64    | 18.1                    | 97.23                      |
| 22              | 0.50                                | 0.65 | 0.70 | 0.60 | 0.61    | 7.1                     | 97.89                      |
| 23              | 0.43                                | 0.50 | 0.53 | 0.65 | 0.53    | 18.9                    | 97.99                      |
| 24              | 0.58                                | 0.72 | 0.68 | 0.62 | 0.65    | 19.4                    | 97.89                      |
| 25              | 0.50                                | 0.58 | 0.60 | 0.72 | 0.60    | 19.4                    | 97.90                      |
| 26              | 0.58                                | 0.50 | 0.60 | 0.55 | 0.56    | 13.8                    | 98.50                      |
| 27              | 0.60                                | 0.56 | 0.66 | 0.52 | 0.59    | 15.2                    | 97.59                      |
| 28              | 0.68                                | 0.52 | 0.63 | 0.55 | 0.60    | 19.1                    | 97.69                      |
| 29              | 0.65                                | 0.55 | 0.60 | 0.53 | 0.58    | 18.5                    | 98.51                      |
| 30              | 0.63                                | 0.68 | 0.63 | 0.65 | 0.65    | 7.4                     | 99.15                      |
| Overall Average |                                     |      |      |      | 0.60    | 15.2                    | 97.79                      |
